# Supplementary material for: Role of Sulfur Compounds in Vegetable and Mushroom Aroma
Source: MDPI journal article supplement (doi:10.3390/molecules27186116), 2022-09-19
Supplement: s1 [file s1]

# Role of sulfur compounds in vegetable and mushroom aroma

Monika A. Marcinkowska, and Henryk H. Jeleń\*

Faculty of Food Science and Nutrition, Poznań University of Life Sciences, Wojska  
Polskiego 31, 60-624 Poznań, Poland; monika.marcinkowska@up.poznan.pl

\* Correspondence: henrykj@up.poznan.pl; Tel.: +48-618-487-273

## Supplementary file

**Table S1.** Variety of sulfur compounds in vegetables and mushrooms.

| Class of Sulfur Compound     | Name                                      | Occurrence in vegetable (family) | Odor quality                        | Reference |
|------------------------------|-------------------------------------------|----------------------------------|-------------------------------------|-----------|
| Isothiocyanates              | allyl isothiocyanate                      | <i>Brassicaceae</i>              | pungent, onion-like                 | [1,2]     |
|                              | 3-butenyl isothiocyanate                  | <i>Brassicaceae</i>              | pungent, garlic-like                | [1,2]     |
|                              | benzyl isothiocyanate                     | <i>Brassicaceae</i>              | herb-like, sweaty, pungent          | [1,2]     |
|                              | 1-isothiocyanato-4-(methylsulfanyl)butane | <i>Brassicaceae</i>              | mushroom-like, broth-like           | [1]       |
|                              | (2-isothiocyanatoethyl)benzene            | <i>Brassicaceae</i>              | broth-like, vegetable-like          | [1]       |
|                              | isopropyl isothiocyanate                  | <i>Brassicaceae</i>              | pungent, grassy                     | [3]       |
|                              | sec-butyl isothiocyanate                  | <i>Brassicaceae</i>              | radish-like, vegetative             | [3]       |
|                              | isobutyl isothiocyanate                   | <i>Brassicaceae</i>              | cooked, pungent, sulphury           | [3]       |
|                              | butyl isothiocyanate                      | <i>Brassicaceae</i>              | peppery, sulphurous, oniony         | [3]       |
|                              | isoamyl isothiocyanate                    | <i>Brassicaceae</i>              | pungent, grassy                     | [3]       |
|                              | 4-pentenyl isothiocyanate                 | <i>Brassicaceae</i>              | pungent, peppery, sulphurous, musty | [3]       |
|                              | pentyl isothiocyanate                     | <i>Brassicaceae</i>              | cabbage, green, rotten              | [3]       |
|                              | octyl isothiocyanate                      | <i>Brassicaceae</i>              | green, vegetative                   | [3]       |
| Nitriles and Epithionitriles | 3-hydroxy-4-pentanenitrile                | <i>Brassicaceae</i>              | nf                                  | [4]       |
|                              | β-hydroxy-thiiranepropanenitrile          | <i>Brassicaceae</i>              | nf                                  | [4]       |
|                              | 3-butenenitrile                           | <i>Brassicaceae</i>              | grassy, pungent                     | [4]       |
|                              | 2-butenenitrile                           | <i>Brassicaceae</i>              | pungent                             | [5]       |

|                           |                                   |                                                                                                                                                                    |                                    |                |
|---------------------------|-----------------------------------|--------------------------------------------------------------------------------------------------------------------------------------------------------------------|------------------------------------|----------------|
|                           | thiiraneacetonitrile              | <i>Brassicaceae</i>                                                                                                                                                | sweaty, onion-like, pungent        | [2–4]          |
|                           | 4-pentanenitrile                  | <i>Brassicaceae</i>                                                                                                                                                | nf                                 | [4]            |
|                           | 3-pentanenitrile                  | <i>Brassicaceae</i>                                                                                                                                                | pungent                            | [5]            |
|                           | thiiranepropanenitrile            | <i>Brassicaceae</i>                                                                                                                                                | nf                                 | [4]            |
|                           | 5-hexanenitrile                   | <i>Brassicaceae</i>                                                                                                                                                | pungent                            | [4,5]          |
|                           | thiiranebutanenitrile             | <i>Brassicaceae</i>                                                                                                                                                | nf                                 | [4]            |
|                           | phenyl-3-propanenitrile           | <i>Brassicaceae</i>                                                                                                                                                | nasturtium                         | [4,6]          |
|                           | 3-methyl-3-butenenitrile          | <i>Brassicaceae</i>                                                                                                                                                | nf                                 | [5]            |
|                           | 5-(methanesulfinyl)pentanenitrile | <i>Brassicaceae</i>                                                                                                                                                | broth-like, onion-like, sulfurous  | [1]            |
|                           | 4-(methylsulfanyl)butanenitrile   | <i>Brassicaceae</i>                                                                                                                                                | broth-like, garlic-like, sulfurous | [1]            |
|                           | 5-(methylsulfanyl)pentanenitrile  | <i>Brassicaceae</i>                                                                                                                                                | broccoli-like, cabbage-like        | [1]            |
|                           | phenylacetonitrile                | <i>Brassicaceae</i>                                                                                                                                                | mushroom-like                      | [1]            |
|                           | 5-methylhexanenitrile             | <i>Brassicaceae</i>                                                                                                                                                | nf                                 | [3]            |
|                           | 6-heptenenitrile                  | <i>Brassicaceae</i>                                                                                                                                                | nf                                 | [3]            |
|                           | benzenepropanenitrile             | <i>Brassicaceae</i>                                                                                                                                                | herbal, green, floral              | [3]            |
| Sulfides and Polysulfides | hydrogen sulfide                  | <i>Brassicaceae,</i><br><i>Caprifoliaceae,</i><br><i>Amaranthaceae</i>                                                                                             | rotten eggs                        | [7,8]          |
|                           | dimethyl sulfide                  | <i>Brassicaceae,</i><br><i>Amaryllidaceae,</i><br><i>Caprifoliaceae,</i><br><i>Amaranthaceae,</i><br><i>Asteraceae,</i><br><i>Solanaceae,</i><br><i>Tuberaceae</i> | cooked asparagus-like, putrid      | [7–13]         |
|                           | dimethyl disulfide                | <i>Amaryllidaceae,</i><br><i>Solanaceae,</i><br><i>Tuberaceae</i>                                                                                                  | cabbage-like, sulfuric             | [1,7,11–14]    |
|                           | dimethyl trisulfide               | <i>Brassicaceae,</i><br><i>Amaryllidaceae,</i><br><i>Fabaceae,</i><br><i>Solanaceae,</i><br><i>Tuberaceae</i>                                                      | sulfuric, cabbage-like             | [1,7,10,12–14] |
|                           | dimethyl tetrasulfide             | <i>Amaranthaceae</i>                                                                                                                                               | cabbage-like, rotten               | [7,15]         |
|                           | methyl 2-methyl-3-furyl disulfide | <i>Brassicaceae</i>                                                                                                                                                | meat-like, cabbage-like            | [1]            |
|                           | methyl propyl disulfide           | <i>Amaryllidaceae</i>                                                                                                                                              | onion-like                         | [7,16]         |
|                           | propyl allyl disulfide            | <i>Amaryllidaceae</i>                                                                                                                                              | onion-like                         | [16,17]        |
|                           | dipropyl disulfide                | <i>Amaryllidaceae</i>                                                                                                                                              | onion-like                         | [7,16]         |
|                           | methyl propyl trisulfide          | <i>Amaryllidaceae</i>                                                                                                                                              | onion-like, cabbage-like           | [7,16]         |
|                           | dipropyl trisulfide               | <i>Amaryllidaceae</i>                                                                                                                                              | onion-like, metallic               | [7,16]         |

|               |                              |                                                                                                                        |                                             |                 |
|---------------|------------------------------|------------------------------------------------------------------------------------------------------------------------|---------------------------------------------|-----------------|
|               | 2-propenyl propyl trisulfide | <i>Amaryllidaceae</i>                                                                                                  | onion-like                                  | [16,17]         |
|               | ethyl methyl disulfide       | <i>Amaryllidaceae</i> ,<br><i>Solanaceae</i>                                                                           | white truffles-like                         | [11,14,18]      |
|               | diallyl sulfide              | <i>Amaryllidaceae</i>                                                                                                  | garlic-like                                 | [7,14]          |
|               | allyl methyl disulfide       | <i>Amaryllidaceae</i>                                                                                                  | garlic-like                                 | [7,14]          |
|               | ethyl propyl disulfide       | <i>Amaryllidaceae</i>                                                                                                  | sulphurous,<br>green, vegetable-<br>like    | [6,14]          |
|               | butyl methyl disulfide       | <i>Amaryllidaceae</i>                                                                                                  | nf                                          | [14]            |
|               | ethyl methyl trisulfide      | <i>Amaryllidaceae</i>                                                                                                  | garlic-like, green,<br>onion-like           | [6,14]          |
|               | diallyl disulfide            | <i>Amaryllidaceae</i>                                                                                                  | garlic-like                                 | [7,14]          |
|               | dipropyl disulfide           | <i>Amaryllidaceae</i>                                                                                                  | onion-like                                  | [7,14]          |
|               | allyl methyl trisulfide      | <i>Amaryllidaceae</i>                                                                                                  | garlic-like                                 | [7,14]          |
|               | methyl propyl trisulfide     | <i>Amaryllidaceae</i>                                                                                                  | onion-like,<br>cabbage-like                 | [7,14]          |
|               | dimethyl tetrasulfide        | <i>Amaryllidaceae</i>                                                                                                  | sulfurous                                   | [6,14]          |
|               | butyl methyl trisulfide      | <i>Amaryllidaceae</i>                                                                                                  | nf                                          | [14]            |
|               | diallyl trisulfide           | <i>Amaryllidaceae</i>                                                                                                  | garlic-like                                 | [7,14]          |
|               | dipropyl trisulfide          | <i>Amaryllidaceae</i>                                                                                                  | onion-like,<br>metallic                     | [7,14]          |
|               | methyl pentyl tetrasulfide   | <i>Amaryllidaceae</i>                                                                                                  | nf                                          | [14]            |
|               | dipropyl tetrasulfide        | <i>Amaryllidaceae</i>                                                                                                  | cooked onion-like                           | [7,14]          |
|               | allyl propyl tetrasulfide    | <i>Amaryllidaceae</i>                                                                                                  | nf                                          | [14]            |
|               | propyl methyl pentasulfide   | <i>Amaryllidaceae</i>                                                                                                  | nf                                          | [14]            |
|               | bis(methylthio)methane       | <i>Tuberaceae</i>                                                                                                      | white truffle-like                          | [12,13]         |
| Thiols        | pentane-1-thiol              | <i>Brassicaceae</i>                                                                                                    | burned, rubber-<br>like                     | [1]             |
|               | (1S)-1-phenylethane-1-thiol  | <i>Brassicaceae</i>                                                                                                    | burned                                      | [1]             |
|               | 2-phenylethane-1-thiol       | <i>Brassicaceae</i>                                                                                                    | rubber-like                                 | [1]             |
|               | 1-propanethiol               | <i>Amaryllidaceae</i>                                                                                                  | leek-like, onion-<br>like                   | [17]            |
|               | 2-propene-1-thiol            | <i>Amaryllidaceae</i>                                                                                                  | garlic-like                                 | [10]            |
|               |                              | <i>Brassicaceae</i> ,<br><i>Caprifoliaceae</i> ,<br><i>Amaranthaceae</i> ,<br><i>Solanaceae</i> ,<br><i>Tuberaceae</i> | sulfurous,<br>gasoline-like,<br>garlic-like | [8,11,13,19]    |
|               | methanethiol                 |                                                                                                                        |                                             |                 |
|               | ethanethiol                  | <i>Solanaceae</i>                                                                                                      | rotten, onion-like                          | [7,11]          |
|               | butanethiol                  | <i>Solanaceae</i>                                                                                                      | garlic-like,<br>burned, rubber-<br>like     | [7,11]          |
|               | 1-menthen-8-thiol            | <i>Brassicaceae</i>                                                                                                    | grape-like,<br>resinous, woody              | [20]            |
| Miscellaneous |                              | <i>Brassicaceae</i> ,<br><i>Liliaceae</i> ,<br><i>Tuberaceae</i>                                                       | cooked potato-<br>like                      | [1,21,22]       |
|               | methionol                    | <i>Brassicaceae</i> ,<br><i>Amaryllidaceae</i> ,                                                                       | cooked potato-<br>like                      | [7,12,13,23–25] |

---

|                                                   |                                                                 |                                      |           |
|---------------------------------------------------|-----------------------------------------------------------------|--------------------------------------|-----------|
|                                                   | <i>Solanaceae,</i><br><i>Tuberaceae</i>                         |                                      |           |
| thiophene-2-carbaldehyde                          | <i>Brassicaceae</i>                                             | roasty                               | [1]       |
| 4-methyl-5-thiazoleethanol                        | <i>Brassicaceae</i>                                             | broth-like,<br>sulfurous, nutty      | [1]       |
| dimethyl sulfone                                  | <i>Brassicaceae</i>                                             | sulfurous                            | [19]      |
| dimethyl sulfoxide                                | <i>Brassicaceae,</i><br><i>Asteraceae,</i><br><i>Tuberaceae</i> | garlic-like,<br>mushroom-like        | [9,19,22] |
| 1,3-thiazole                                      | <i>Brassicaceae</i>                                             | roasty                               | [5]       |
| 5-methyl-1,3-thiazole                             | <i>Brassicaceae</i>                                             | roasty, meat-like                    | [5]       |
| 5-ethyl-1,3-thiazole                              | <i>Brassicaceae</i>                                             | roasty                               | [5]       |
| 2-methyl-3-furanthiol                             | <i>Brassicaceae,</i><br><i>Tuberaceae</i>                       | meat-like, onion-<br>like            | [5,12]    |
| S-methyl thioacetate                              | <i>Liliaceae</i>                                                | warm, cooked-<br>like                | [21]      |
| 2,4-dimethylthiophene                             | <i>Amaryllidaceae</i>                                           | nf                                   | [16]      |
| 2,5-dimethylthiophene                             | <i>Amaryllidaceae</i>                                           | nutty, sulfurous                     | [6,16]    |
| 3,4- or 2,4-dimethyl thiophen                     | <i>Amaryllidaceae</i>                                           | wood, dry smell,<br>green, bookstore | [17]      |
| 2-acetylthiazole                                  | <i>Brassicaceae,</i><br><i>Solanaceae</i>                       | roasty, popcorn-<br>like             | [1,7,11]  |
| benzothiazole                                     | <i>Brassicaceae,</i><br><i>Asteraceae,</i><br><i>Solanaceae</i> | rubber-like,<br>cabbage-like         | [1,9,11]  |
| cycloalliin                                       | <i>Amaryllidaceae</i>                                           | nf                                   | [26]      |
| S-methyl-L-cysteine sulfoxide<br>(methiin)        | <i>Brassicaceae,</i><br><i>Amaryllidaceae</i>                   | odourless                            | [26–28]   |
| S-propyl-L-cysteine sulfoxide<br>(propiin)        | <i>Amaryllidaceae</i>                                           | odourless                            | [26,27]   |
| S-allyl-L-cysteine sulfoxides<br>(alliine)        | <i>Amaryllidaceae</i>                                           | odourless                            | [26,27]   |
| S-propenyl-1-L-cysteine<br>sulfoxides (isoalliin) | <i>Amaryllidaceae</i>                                           | odourless                            | [26,27]   |
| 2-propenyl sulfenic acid                          | <i>Amaryllidaceae</i>                                           | nf                                   | [29]      |
| ( <i>E</i> )-1-propenyl sulfenic acid             | <i>Amaryllidaceae</i>                                           | nf                                   | [29]      |
| diallyl thiosulfinate (allicin)                   | <i>Amaryllidaceae</i>                                           | freshly crushed<br>garlic-like       | [30]      |
| methylmethanethiosulfinate                        | <i>Brassicaceae,</i><br><i>Amaryllidaceae</i>                   | freshly cut onion-<br>like           | [27,31]   |
| 1-propenyl thiosulfinates                         | <i>Amaryllidaceae</i>                                           | freshly cut onion-<br>like           | [27,31]   |
| 3-vinyl-4 <i>H</i> -1,2-dithiin                   | <i>Amaryllidaceae</i>                                           | garlic-like                          | [23]      |
| 2-vinyl-4 <i>H</i> -1,3-dithiin                   | <i>Amaryllidaceae</i>                                           | pungent, garlic-<br>like             | [23]      |
| 5-methyl-2-<br>thiophenecarboxaldehyde            | <i>Amaryllidaceae</i>                                           | aniseed-like                         | [23]      |
| 1,2,4-trithiolane                                 | <i>Omphalotaceae</i>                                            | sulfury, onion-<br>like              | [7,32]    |
| 1,2,4,5-tetrathiane                               | <i>Omphalotaceae</i>                                            | sulfury, burned                      | [7,32]    |

---

|                |                               |                      |                                  |         |
|----------------|-------------------------------|----------------------|----------------------------------|---------|
|                | lenthionine                   | <i>Omphalotaceae</i> | sulfury, burned                  | [32,33] |
|                | hexathiepane                  | <i>Omphalotaceae</i> | nf                               | [32]    |
|                | cyclic octaatomiac sulfur     | <i>Omphalotaceae</i> | nf                               | [32]    |
|                | 2-methyl-4,5-dihydrothiophene | <i>Tuberaceae</i>    | aged cheese-like,<br>rubber-like | [12,13] |
|                | 3-methyl-4,5-dihydrothiophene | <i>Tuberaceae</i>    | onion-like, truffle-<br>like     | [12]    |
| nf, not found. |                               |                      |                                  |         |

- Marcinkowska, M.; Frank, S.; Steinhaus, M.; Jeleń, H.H. Key Odorants of Raw and Cooked Green Kohlrabi (*Brassica oleracea* var. *gongylodes* L.). *J. Agric. Food Chem.* **2021**, *69*, 12270–12277, doi:10.1021/acs.jafc.1c04339.
- Kroener, E.M.; Buettner, A. Sensory-analytical comparison of the aroma of different horseradish varieties (*Armoracia rusticana*). *Front. Chem.* **2018**, *6*, 1–11, doi:10.3389/fchem.2018.00149.
- Bell, L.; Kitsopanou, E.; Oloyede, O.O.; Lignou, S. Important odorants of four brassicaceae species, and discrepancies between glucosinolate profiles and observed hydrolysis products. *Foods* **2021**, *10*, doi:10.3390/foods10051055.
- Collett, M.G.; Stegelmeier, B.L.; Tapper, B.A. Could nitrile derivatives of turnip (*Brassica rapa*) glucosinolates be hepato- or cholangiotoxic in cattle? *J. Agric. Food Chem.* **2014**, *62*, 7370–7375, doi:10.1021/jf500526u.
- Jia, X.; Wang, L.; Zheng, C.; Yang, Y.; Wang, X.; Hui, J.; Zhou, Q. Key Odorant Differences in Fragrant *Brassica napus* and *Brassica juncea* Oils Revealed by Gas Chromatography–Olfactometry, Odor Activity Values, and Aroma Recombination. *J. Agric. Food Chem.* **2020**, *68*, 14950–14960, doi:10.1021/acs.jafc.0c05944.
- Nursten, H.E. *The Maillard Reaction*; The Royal Society of Chemistry, 2005; ISBN 978-0-85404-964-6.
- Kreissl, J.; Mall, V.; Steinhaus, P.; Steinhaus, M. Leibniz-LSB@TUM Odorant Database, Version 1.0. Leibniz-Institute for Food Systems Biology at the Technical University of Munich: Freising, Germany Available online: <https://www.leibniz-lsb.de/en/databases/leibniz-lsb-tum-odorant-database> (accessed on May 18, 2021).
- Dryahina, K.; Som, S.; Smith, D.; Španěl, P. Characterization of spoilage-related volatile organic compounds in packaged leaf salads. *Flavour Fragr. J.* **2020**, *35*, 24–33, doi:10.1002/ffj.3535.
- Deza-Durand, K.M.; Petersen, M.A. Volatile compounds of modified atmosphere packaged cut iceberg lettuce: Effect of extremely low O<sub>2</sub>, season, cultivar and storage time. *Food Res. Int.* **2014**, *62*, 254–261, doi:10.1016/j.foodres.2014.02.017.
- Van Ruth, S.M.; Roozen, J.P.; Cozijnsen, J.L.; Posthumus, M.A. Volatile compounds of rehydrated French beans, bell peppers and leeks. Part II. Gas chromatography/sniffing port analysis and sensory evaluation. *Food Chem.* **1995**, *54*, 1–7, doi:10.1016/0308-8146(95)92655-4.

11. Dresow, J.F.; Böhm, H. The influence of volatile compounds of the flavour of raw, boiled and baked potatoes: Impact of agricultural measures on the volatile components. *Landbauforsch. Volkenrode* **2009**, *59*, 309–337.
12. Vahdatzadeh, M.; Deveau, A.; Splivallo, R. The role of the microbiome of truffles in aroma formation: A meta-analysis approach. *Appl. Environ. Microbiol.* **2015**, *81*, 6946–6952, doi:10.1128/AEM.01098-15.
13. Splivallo, R.; Ottonello, S.; Mello, A.; Karlovsky, P. Truffle volatiles: From chemical ecology to aroma biosynthesis. *New Phytol.* **2011**, *189*, 688–699, doi:10.1111/j.1469-8137.2010.03523.x.
14. Pino, J.A.; Fuentes, V.; Correa, M.T. Volatile constituents of Chinese chive (*Allium tuberosum* Rottl. ex Sprengel) and rakkyo (*Allium chinense* G. Don). *J. Agric. Food Chem.* **2001**, *49*, 1328–1330, doi:10.1021/jf9907034.
15. Masanetz, C.; Guth, H.; Grosch, W. Fishy and hay-like off-flavours of dry spinach. *Eur. Food Res. Technol.* **1998**, *206*, 108–113.
16. Chung, M.S. Volatile compounds of the cultivated dumebuchu (*Allium senescens* L. var. *senescens*). *Food Sci. Biotechnol.* **2010**, *19*, 1679–1682, doi:10.1007/s10068-010-0238-0.
17. Nielsen, G.S.; Poll, L. Determination of Odor Active Aroma Compounds in Freshly Cut Leek (*Allium ampeloprasum* Var. *Bulga*) and in Long-Term Stored Frozen Unblanched and Blanched Leek Slices by Gas Chromatography Olfactometry Analysis. *J. Agric. Food Chem.* **2004**, *52*, 1642–1646, doi:10.1021/jf030682k.
18. Chemical Book. Available online: <https://www.chemicalbook.com/> (accessed on 18th January 2022).
19. Zhou, Q.; Tang, H.; Jia, X.; Zheng, C.; Huang, F.; Zhang, M. Distribution of glucosinolate and pungent odors in rapeseed oils from raw and microwaved seeds. *Int. J. Food Prop.* **2018**, *21*, 2296–2308, doi:10.1080/10942912.2018.1514632.
20. Hong, S.J.; Boo, C.G.; Lee, J.; Hur, S.W.; Jo, S.M.; Jeong, H.; Yoon, S.; Lee, Y.; Park, S.S.; Shin, E.C. Chemosensory approach supported-analysis of wintering radishes produced in Jeju island by different processing methods. *Food Sci. Biotechnol.* **2021**, *30*, 1033–1049, doi:10.1007/s10068-021-00948-2.
21. Ulrich, D.; Hoberg, E.; Bittner, T.; Engewald, W.; Meilchen, K. Contribution of volatile compounds to the flavor of cooked asparagus. *Eur. Food Res. Technol.* **2001**, *213*, 200–204, doi:10.1007/s002170100349.
22. Mustafa, A.M.; Angeloni, S.; Nzekoue, F.K.; Abouelenein, D.; Sagratini, G.; Caprioli, G.; Torregiani, E. An overview on truffle aroma and main volatile compounds. *Molecules* **2020**, *25*, 1–27, doi:10.3390/molecules25245948.
23. Abe, K.; Hori, Y.; Myoda, T. Characterization of key aroma compounds in aged garlic extract. *Food Chem.* **2020**, *312*, 126081, doi:10.1016/j.foodchem.2019.126081.
24. Jia, X.; Wang, L.; Zheng, C.; Yang, Y.; Wang, X.; Hui, J.; Zhou, Q. Key Odorant Differences in Fragrant Brassica napus and Brassica juncea Oils Revealed by Gas Chromatography-Olfactometry, Odor Activity Values, and Aroma Recombination. *J.*

*Agric. Food Chem.* **2020**, *68*, 14950–14960, doi:10.1021/acs.jafc.0c05944.

25. Bough, R.A.; Holm, D.G.; Jayanty, S.S. Evaluation of Cooked Flavor for Fifteen Potato Genotypes and the Correlation of Sensory Analysis to Instrumental Methods. *Am. J. Potato Res.* **2020**, *97*, 63–77, doi:10.1007/s12230-019-09757-0.
26. Goncharov, N.; Orekhov, A.N.; Voitenko, N.; Ukolov, A.; Jenkins, R.; Avdonin, P. *Organosulfur Compounds as Nutraceuticals*; Elsevier Inc., 2016; ISBN 9780128021477.
27. Olech, Z.; Zaborska, W.; Kot, M. Jack bean urease inhibition by crude juices of *Allium* and *Brassica* plants. Determination of thiosulfinates. *Food Chem.* **2014**, *145*, 154–160, doi:10.1016/j.foodchem.2013.08.044.
28. Rose, P.; Moore, P.K.; Whiteman, M.; Zhu, Y.Z. An appraisal of developments in *Allium* sulfur chemistry: Expanding the pharmacopeia of garlic. *Molecules* **2019**, *24*, 1–17, doi:10.3390/molecules24214006.
29. Yoshimoto, N.; Saito, K. S-Alk(en)ylcysteine sulfoxides in the genus *Allium*: Proposed biosynthesis, chemical conversion, and bioactivities. *J. Exp. Bot.* **2019**, *70*, 4123–4137, doi:10.1093/jxb/erz243.
30. Borlinghaus, J.; Foerster, J.; Kappler, U.; Antelmann, H.; Noll, U.; Gruhlke, M.C.H.; Slusarenko, A.J. Allicin, the odor of freshly crushed garlic: A review of recent progress in understanding allicin's effects on cells. *Molecules* **2021**, *26*, doi:10.3390/molecules26061505.
31. Løkke, M.M.; Edelenbos, M.; Larsen, E.; Feilberg, A. Investigation of volatiles emitted from freshly cut onions (*Allium cepa* L.) by real time proton-transfer reaction-mass spectrometry (PTR-MS). *Sensors (Switzerland)* **2012**, *12*, 16060–16076, doi:10.3390/s121216060.
32. Li, S.; Wang, A.; Liu, L.; Tian, G.; Wei, S.; Xu, F. Evaluation of nutritional values of shiitake mushroom (*Lentinus edodes*) stipes. *J. Food Meas. Charact.* **2018**, *12*, 2012–2019, doi:10.1007/s11694-018-9816-2.
33. Wang, S.L.; Lin, S.Y.; Du, H.T.; Qin, L.; Lei, L.M.; Chen, D. An insight by molecular sensory science approaches to contributions and variations of the key odorants in shiitake mushrooms. *Foods* **2021**, *10*, doi:10.3390/foods10030622.
